# Supplementary material for: Protection of HeLa cells against ROS stress by CuZnSOD mimic system
Source: Royal Society of Chemistry journal article supplement (doi:10.1039/c3tb21052a), 2013-01-01
Supplement: c3tb21052a.pdf [file c3tb21052a.pdf]

## Protection of HeLa Cells against ROS Stress by CuZnSOD Mimic System

Ya-Cheng Fang,<sup>a</sup> Yi-Ping Chen,<sup>a</sup> Chien-Tsu Chen,<sup>b</sup> Tien-Sung Lin,<sup>c</sup> and Chung-Yuan Mou<sup>\*a</sup>

<sup>a</sup> Department of Chemistry, National Taiwan University, No.1 Sec 4, Roosevelt Road, Taipei, 10617 (Taiwan), Fax: (+886) 2-23660954, E-mail: [cymou@ntu.edu.tw](mailto:cymou@ntu.edu.tw)

<sup>b</sup> Department of Biochemistry, Taipei Medical University, Taipei, Taiwan

<sup>c</sup> Department of Chemistry, Washington University, One Brookings Drive, St. Louis, MO 63130 USA\_

### Supplementary Information for Results and Discussion:

#### Density Function Theory (DFT) calculations of model complex.

**Figure S1.** The ESI-MS spectrum of SOD-mimic CZpbi complex (as the perchlorate salt) with the focus molecular ion region: (a) simulated and (b) measured.

**Figure S2.** Small-angle powder XRD patterns of FITC-MSN solids and FITC-MSN-CZpbi.

**Figure S3.** Nitrogen adsorption-desorption isotherms plots of FITC-MSN and FITC-MSN-CZpbi.

**Figure S4.** TGA/DTG profiles of FITC-MSN-CZpbi and CZpbi solids. Blue line: weight loss; red line: derivative weight loss.

#### Density Function Theory (DFT) calculations of model complex

Since a crystallographic study of the model complex is not possible due to its unattainable single crystal form. We applied the hybrid density functional theory (DFT) (B3LYP)<sup>30-32</sup> in conjunction with the 6-31G\* basis set to calculate the structural and conformation of copper and the rest of atoms of the model complex. The relevant structures of CZpbi complex were fully optimized in the gas phase. Open shell systems were treated using unrestricted DFT. The final theoretical structure

of CZpbi is shown in Figure 1. The optimized bond distances for Cu-N's are: Cu-N<sub>1</sub> = 2.017, Cu-N<sub>2</sub> = 2.000, Cu-N<sub>3</sub> = 2.121, Cu-N<sub>4</sub> = 1.998, and Cu-N<sub>5</sub> = 2.155 Å. The bond distance for Cu-N<sub>1</sub> is indeed shorter than the average Cu-N distance of 2.112 Å in other Cu(II)Zn(II) complexes reported previously.<sup>15</sup>

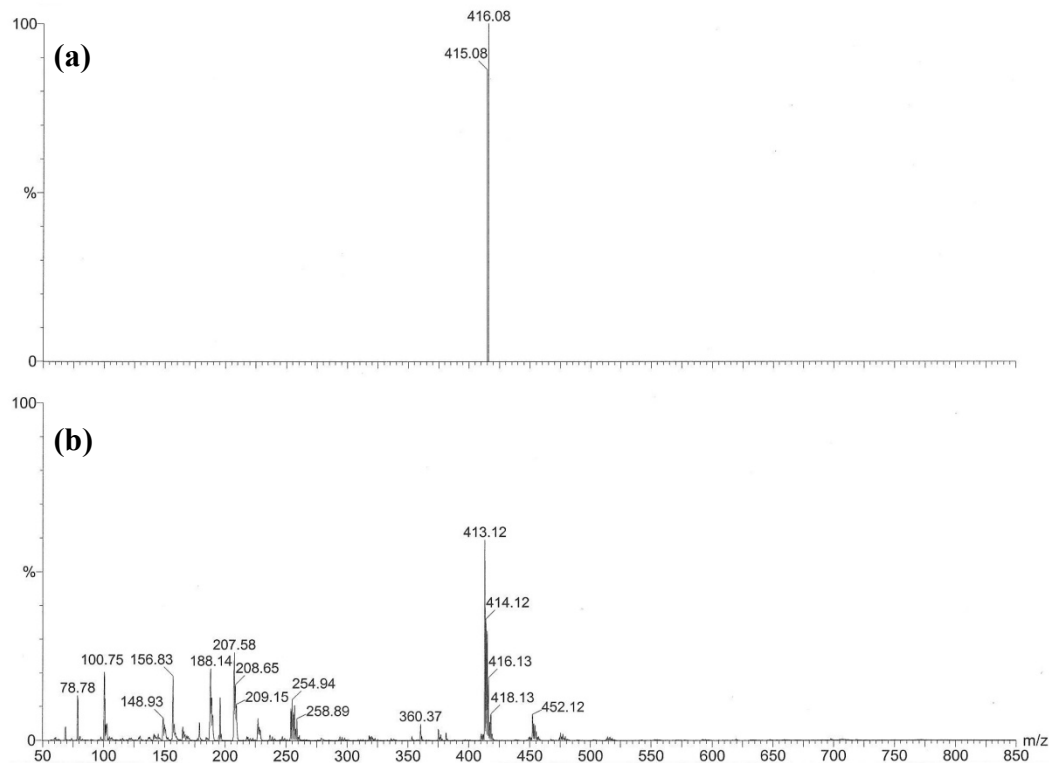

**Figure S1.** The ESI-MS spectrum of SOD-mimic CZpbi complex (as the perchlorate salt) with the focus molecular ion region: (a) simulated and (b) measured.

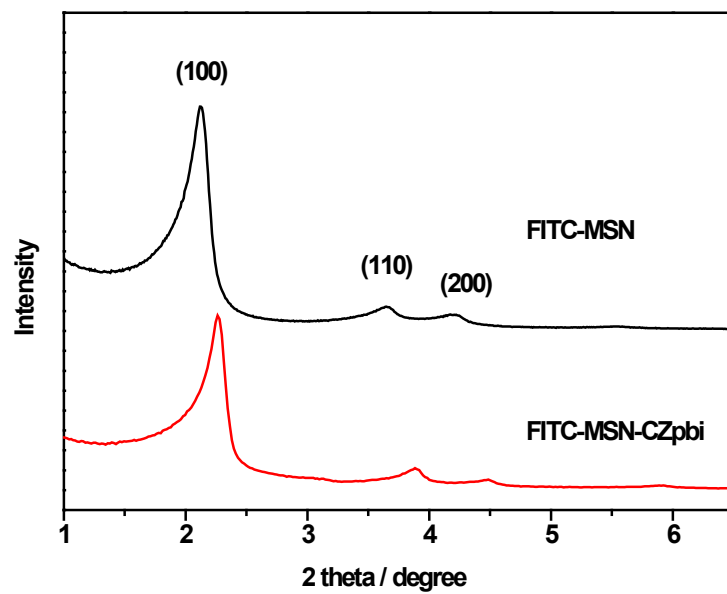

**Figure S2.** Small-angle powder XRD patterns for FITC-MSN solids and FITC-MSN-CZpbi.

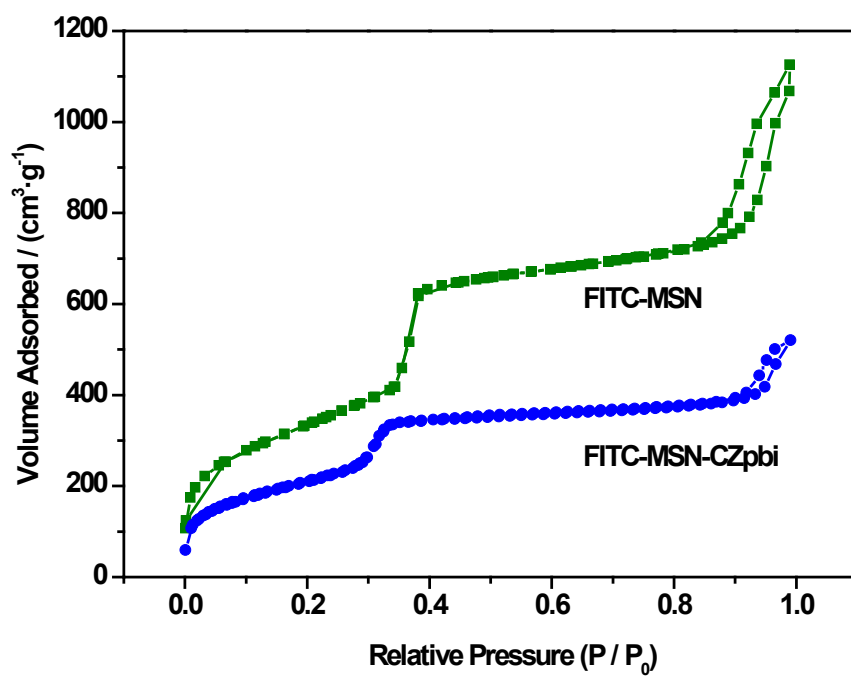

**Figure S3.** Nitrogen adsorption–desorption isotherms plots for FITC-MSN and FITC-MSN-CZpbi.

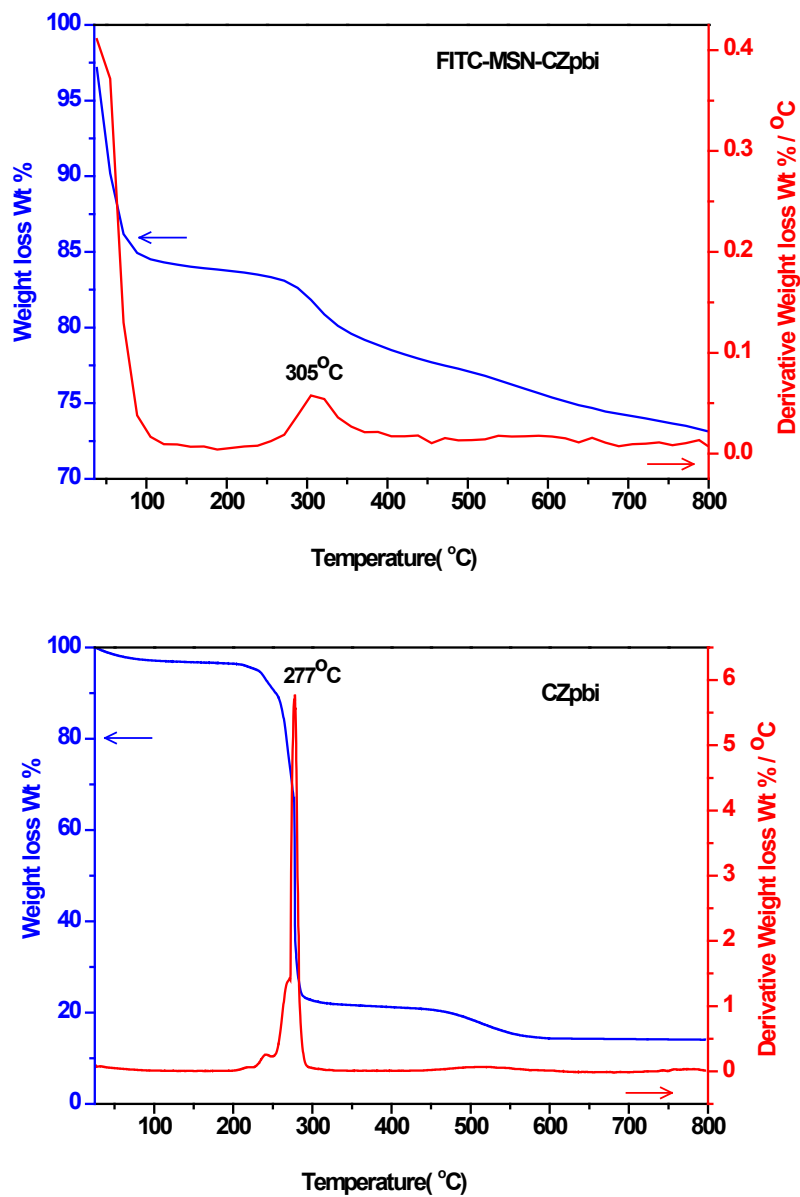

**Figure S4.** TGA/DTG profiles of FITC-MSN-CZpbi and CZpbi. Blue line: weight loss; red line: derivative weight loss.
